# Supplementary material
Source: ML conference proceedings conference paper supplement (https://openaccess.thecvf.com/content/cvpr_2016/html/Yang_Stacked_Attention_Networks_2016_CVPR_paper.html)
Supplement: Supplementary file 1 [file Yang_Stacked_Attention_Networks_2016_CVPR_supplemental.pdf]

What take the nap with a blanket?  
Answer: dogs Prediction: dogs

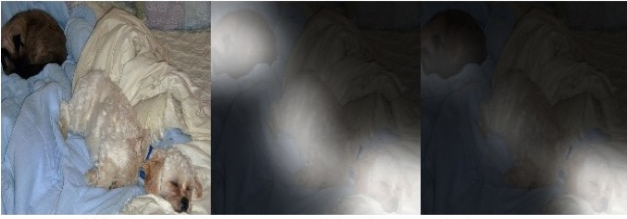

What is the color of the cake?  
Answer: brown Prediction: white

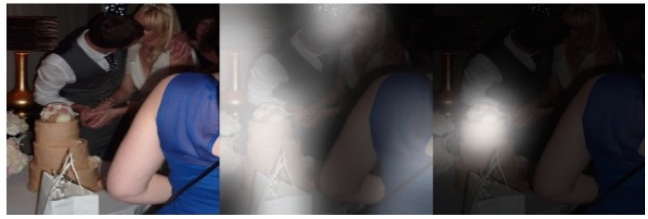

What stands between two blue lounge chairs on an empty beach?  
Answer: umbrella Prediction: umbrella

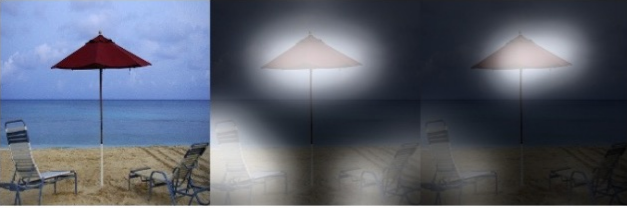

What is the color of the motorcycle?  
Answer: blue Prediction: blue

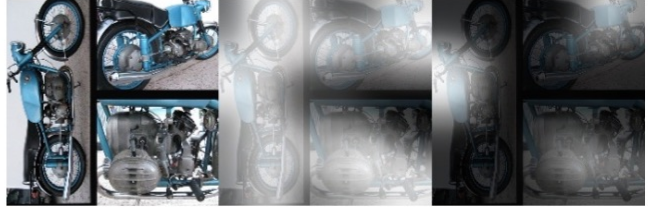

What is sitting in the luggage bag?  
Answer: cat Prediction: cat

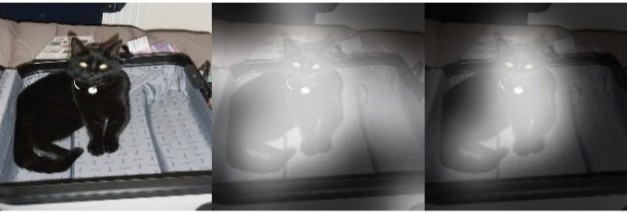

What is the color of the design?  
Answer: red Prediction: red

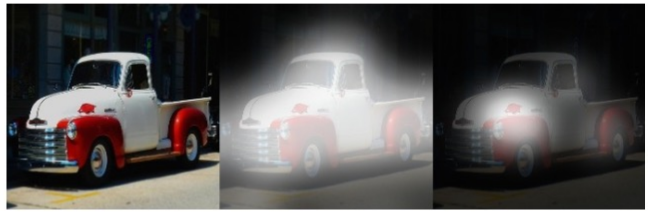

What is the color of the trucks?  
Answer: green Prediction: green

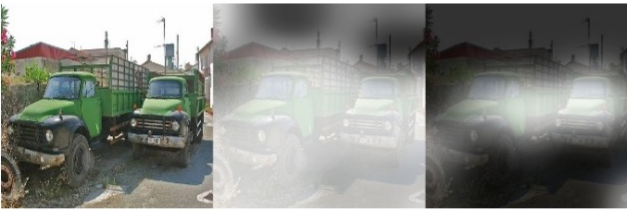

What is in front of the clear sky?  
Answer: tower Prediction: tower

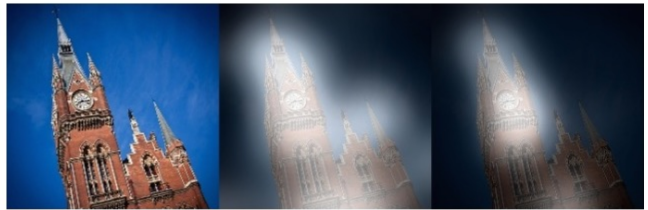

What is next to the desk with a computer and laptop?  
Answer: chair Prediction: chair

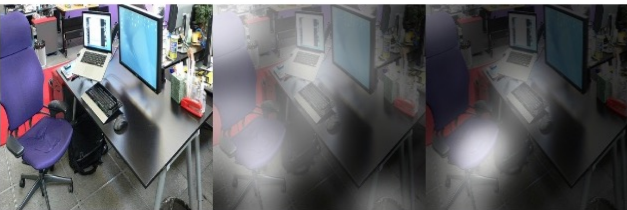

What is the color of the surface?  
Answer: white Prediction: white

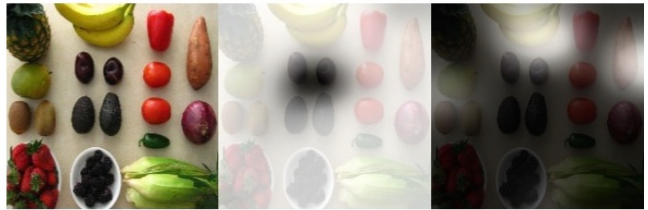

What are flying against the cloudy sky?  
Answer: kites Prediction: kites

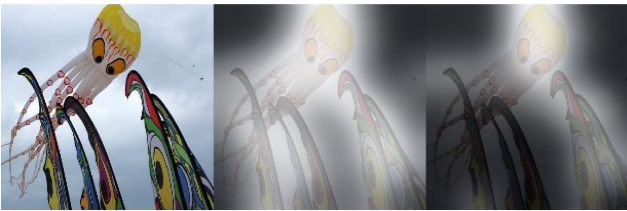

Where do the young adult make us standing?  
Answer: room Prediction: room

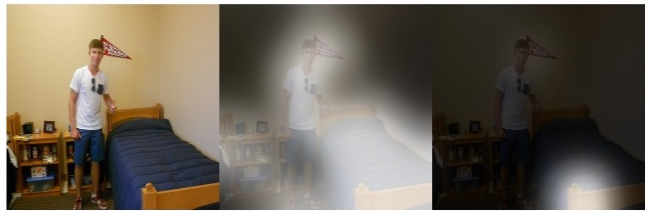

Original Image First Attention Layer Second Attention Layer Original Image First Attention Layer Second Attention Layer

Figure 7: More examples
